# Supplementary material for: A metabolomics approach to study the dual modulation by characterization of chemical alteration during processing of Gardeniae Fructus using UPLC-ESI-QTOF
Source: Royal Society of Chemistry journal article supplement (doi:10.1039/c5ay03265b), 2016-01-01
Supplement: c5ay03265b1.pdf [file c5ay03265b1.pdf]

### MS<sup>2</sup> spectrum of Geniposide in reference

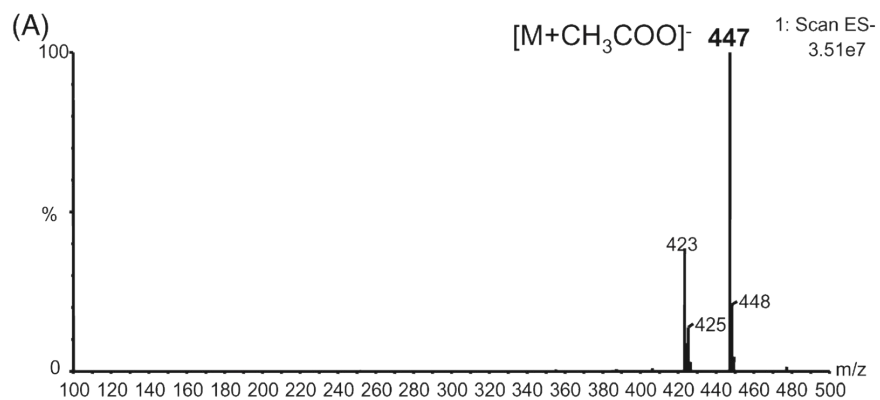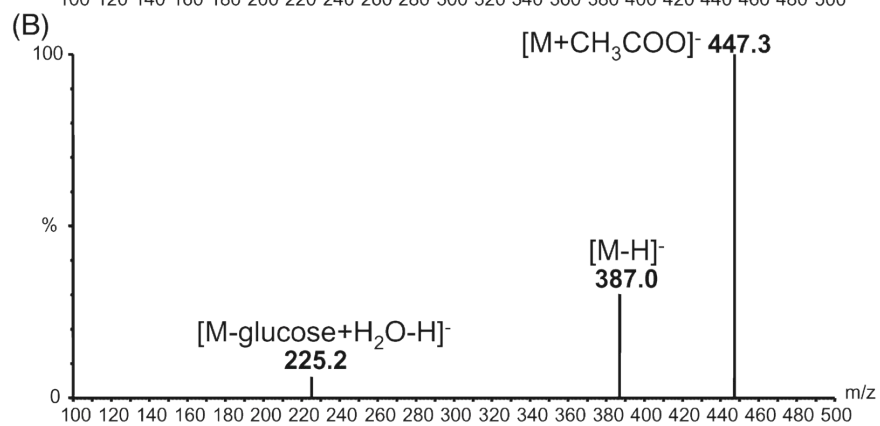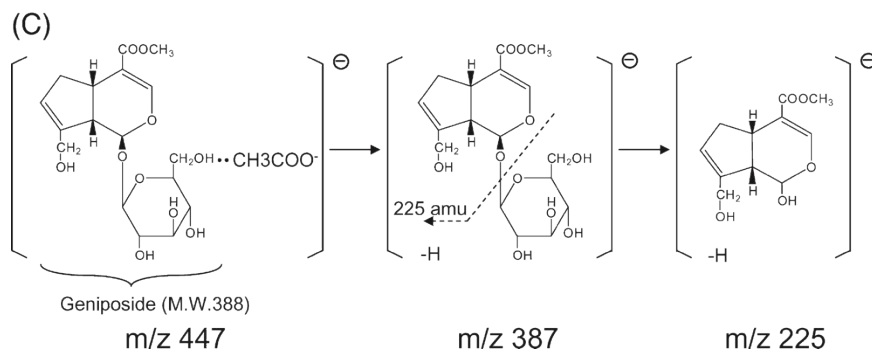

## MS<sup>2</sup> fragmentation ions of Mussaenosidic acid in reference

Table 1 Chemical constituents identified in an extract of YCHD by HPLC-Q/TOF-MS/MS in negative ion mode

| Peak no. | <i>t<sub>R</sub></i> (min) | Molecular formula                               | Theoretical [M – H] <sup>–</sup> | Measured [M – H] <sup>–</sup> | Error <sup>a</sup> (ppm) | Characteristic MS/MS fragmentation ions (% base peak) ( <i>m/z</i> )                                                 | Proposed compounds                      |
|----------|----------------------------|-------------------------------------------------|----------------------------------|-------------------------------|--------------------------|----------------------------------------------------------------------------------------------------------------------|-----------------------------------------|
| 1        | 0.803                      | C <sub>12</sub> H <sub>22</sub> O <sub>11</sub> | 377.0856 <sup>b</sup>            | 377.0857                      | 0.27                     | 341 (100), 215 (11.1), 179 (20.5), 119 (18.1), 89 (49.6), 59 (34.1)                                                  | Gentiobiose                             |
| 2        | 0.972                      | C <sub>5</sub> H <sub>7</sub> NO <sub>3</sub>   | 128.0353                         | 128.0364                      | 8.59                     | 101.0257 (17.8), 88.0426 (54.1), 85.0308 (100)                                                                       | Pyroglutamic acid                       |
| 3        | 1.309                      | C <sub>7</sub> H <sub>6</sub> O <sub>5</sub>    | 169.0137                         | 169.0136                      | –0.59                    | 125.0238 (100), 107.0133 (2.2), 79.0193 (12.2)                                                                       | Gallic acid                             |
| 4        | 1.646                      | C <sub>19</sub> H <sub>26</sub> O <sub>15</sub> | 493.1199                         | 493.1189                      | –2.03                    | 313.0564 (63.2), 271.0455 (66.2), 211.0240 (21.9), 169.0137 (100), 125.0237 (30.7)                                   | 6-O-Galloylsucrose                      |
| 5        | 1.815                      | C <sub>12</sub> H <sub>22</sub> O <sub>10</sub> | 373.1140                         | 373.1146                      | 1.61                     | 211.0612 (27.4), 193.0502 (5.8), 167.0712 (13.6), 149.0604 (78.9), 123.0453 (100)                                    | Geniposidic acid <sup>f</sup>           |
| 6        | 2.068                      | C <sub>13</sub> H <sub>16</sub> O <sub>9</sub>  | 315.0722                         | 315.0722                      | 0.00                     | 153.0190 (32.4), 152.0115 (47.9), 109.0291 (34.4), 108.0227 (100)                                                    | Protocatechuic acid-3-glucoside         |
| 7        | 2.237                      | C <sub>16</sub> H <sub>26</sub> O <sub>9</sub>  | 397.1271 <sup>b</sup>            | 397.1265                      | –1.51                    | 361.1496 (100), 317.1589 (1.9), 181.0862 (31.7), 137.0964 (11.2), 89.0245 (12.4), 59.0144 (20.6)                     | Villosolside                            |
| 8        | 2.405                      | C <sub>16</sub> H <sub>18</sub> O <sub>9</sub>  | 353.0878                         | 353.0878                      | 0.00                     | 191.0538 (100), 85.0284 (7.9)                                                                                        | 1-CQA                                   |
| 9        | 2.405                      | C <sub>16</sub> H <sub>24</sub> O <sub>11</sub> | 391.1246                         | 391.1250                      | 1.02                     | 229.0713 (24.5), 211.0611 (17.1), 185.0823 (75.2), 167.0712 (93.1), 149.0616 (100), 141.0549 (42.5), 123.0449 (57.9) | Shanzhiside                             |
| 10       | 3.401                      | C <sub>12</sub> H <sub>18</sub> O <sub>9</sub>  | 353.0878                         | 353.0878                      | 0.00                     | 191.0538 (100), 179.0326 (51.1), 135.0429 (62.5)                                                                     | Neochlorogenic acid (5-CQA)             |
| 11       | 3.67                       | C <sub>17</sub> H <sub>24</sub> O <sub>11</sub> | 439.1013 <sup>b</sup>            | 439.1007                      | –1.37                    | 403.1247 (8.9), 241.0719 (100), 223.0610 (12.3), 139.0397 (43.7), 101.0239 (31.8)                                    | Scandoside methyl ester                 |
| 12       | 3.754                      | C <sub>16</sub> H <sub>26</sub> O <sub>8</sub>  | 381.1322 <sup>b</sup>            | 381.1319                      | –0.79                    | 345.1548 (50.6), 179.0547 (15.9), 165.0913 (100), 121.1017 (12.9), 119.0345 (19.0), 89.0245 (56.9)                   | Picrocrocinic acid                      |
| 13       | 3.754                      | C <sub>16</sub> H <sub>22</sub> O <sub>11</sub> | 389.1089                         | 389.1088                      | –0.26                    | 227.0566 (24.3), 209.0450 (48.9), 183.0667 (51.1), 165.0551 (100), 139.0395 (53.9)                                   | Deacetylasperulosidic acid              |
| 14       | 4.344                      | C <sub>12</sub> H <sub>24</sub> O <sub>9</sub>  | 395.1114 <sup>b</sup>            | 395.1111                      | –0.76                    | 359.1346 (95.4), 197.0813 (100), 125.0612 (62.4), 107.0492 (28.9)                                                    | Ixoroside                               |
| 15       | 4.85                       | C <sub>17</sub> H <sub>26</sub> O <sub>11</sub> | 405.1402                         | 405.1395                      | –1.73                    | 225.0766 (29.3), 179.0566 (57.6), 141.0555 (82.2), 123.0447 (48.5), 119.0349 (30.4), 101.0239 (100)                  | Shanzhiside methyl ester                |
| 16       | 4.934                      | C <sub>17</sub> H <sub>24</sub> O <sub>11</sub> | 439.1013 <sup>b</sup>            | 439.1015                      | 0.46                     | 403.1249 (30.5), 241.0714 (100), 223.0615 (14.1), 139.0399 (87.3), 121.0299 (46.8), 101.0242 (24.1)                  | Gardenoside                             |
| 17       | 5.778                      | C <sub>17</sub> H <sub>24</sub> O <sub>11</sub> | 439.1013 <sup>b</sup>            | 439.1005                      | –1.82                    | 403.1246 (12.6), 241.0710 (100), 223.0617 (40.8), 139.0394 (71.9), 101.0248 (52.6)                                   | Deacetylasperulosidic acid methyl ester |
| 18       | 6.368                      | C <sub>15</sub> H <sub>14</sub> O <sub>6</sub>  | 289.0718                         | 289.0710                      | –2.77                    | 245.0816 (45.1), 203.0706 (35.3), 137.0242 (30.25), 123.0450 (78.6), 109.0294 (100)                                  | Catechin                                |
| 19       | 6.436                      | C <sub>16</sub> H <sub>18</sub> O <sub>9</sub>  | 353.0878                         | 353.0878                      | 0.00                     | 191.0547 (100), 85.0294 (6.1)                                                                                        | Chlorogenic acid (3-CQA) <sup>f</sup>   |
| 20       | 6.874                      | C <sub>9</sub> H <sub>6</sub> O <sub>4</sub>    | 179.0350                         | 179.0350                      | 0.00                     | 135.0437 (100), 89.0395 (5.7)                                                                                        | Caffeic acid <sup>d</sup>               |
| 21       | 7.632                      | C <sub>16</sub> H <sub>18</sub> O <sub>9</sub>  | 353.0878                         | 353.0878                      | 0.00                     | 191.0535 (60.7), 179.0324 (70.3), 173.0426 (100), 135.0431 (80.9), 93.0335 (27.6)                                    | Cryptochlorogenic acid (4-CQA)          |
| 22       | 7.885                      | C <sub>16</sub> H <sub>24</sub> O <sub>10</sub> | 375.1297                         | 375.1303                      | 1.60                     | 213.0764 (39.1), 195.0660 (38.4), 169.0877 (47.9), 151.0770 (95.2), 125.0605 (80.7), 107.0510 (100)                  | Mussaenosidic acid                      |
| 23       | 8.307                      | C <sub>23</sub> H <sub>34</sub> O <sub>15</sub> | 585.1592 <sup>b</sup>            | 585.1584                      | –1.37                    | 549.1815 (12.3), 225.0769 (69.3), 207.0657 (13.4), 123.0449 (100), 101.0243 (64.9)                                   | Genipin gentiobioside <sup>e</sup>      |
| 24       | 8.56                       | C <sub>8</sub> H <sub>6</sub> O <sub>2</sub>    | 135.0452                         | 135.0453                      | 0.74                     | 120.0244 (5.5), 108.0206 (10.8), 92.0279 (100)                                                                       | 4'-Hydroxyacetophenone                  |
| 25       | 9.487                      | C <sub>17</sub> H <sub>24</sub> O <sub>10</sub> | 423.1063 <sup>b</sup>            | 423.1070                      | 1.65                     | 387.1282 (5.5), 225.0762 (100), 207.0653 (13.5), 123.0447 (85.3), 101.0243 (74.5)                                    | Geniposide <sup>c</sup>                 |

## MS<sup>2</sup> fragmentation ions of Jasminoside B in reference

Table 2 Chromatographic and mass spectral data of the fifty-five compounds in Zhi-Zi-Da-Huang decoction<sup>a</sup>

| No. | t <sub>R</sub> (min) | Formula                                         | Quasi-molecular (+/-) | ppm (+/-)      | UV (nm)       | Fragment ions (+/-)                                                     | Assignment                                |
|-----|----------------------|-------------------------------------------------|-----------------------|----------------|---------------|-------------------------------------------------------------------------|-------------------------------------------|
| 1   | 12.794               | C <sub>16</sub> H <sub>22</sub> O <sub>11</sub> | —<br>389.1097         | —<br>-1.96     | 225           | —<br>227, 209, 183, 165,<br>147, 139                                    | Deacetylasperulosidic acid                |
| 2   | 13.345               | C <sub>16</sub> H <sub>22</sub> O <sub>11</sub> | —<br>389.1104         | —<br>-3.76     | 225           | —<br>227, 209, 183, 165, 147,<br>139, 119, 191                          | Scandoside                                |
| 3   | 16.629               | C <sub>16</sub> H <sub>24</sub> O <sub>11</sub> | 415.1224<br>391.1228  | -3.36<br>4.55  | 235           | —<br>229, 211, 192, 185,<br>167, 149                                    | Caryoptosidic acid                        |
| 4   | 16.979               | C <sub>7</sub> H <sub>6</sub> O <sub>4</sub>    | —<br>153.0197         | —<br>-2.39     | 220, 255      | —<br>153, 134, 124, 109                                                 | Gentisic acid                             |
| 5   | 16.996               | C <sub>16</sub> H <sub>24</sub> O <sub>11</sub> | 415.1222<br>391.1232  | -2.85<br>3.53  | 235           | 253, 235<br>229, 211, 193, 185, 167,<br>149, 127, 119                   | Shanzhiside                               |
| 6   | 17.229               | C <sub>17</sub> H <sub>24</sub> O <sub>11</sub> | 427.1231<br>463.1438  | -3.51<br>4.12  | 240           | —<br>403, 241, 223, 193                                                 | 6 $\alpha$ -Hydroxygeniposide             |
| 8   | 19.280               | C <sub>16</sub> H <sub>26</sub> O <sub>8</sub>  | 369.1526<br>345.1536  | -1.77<br>4.31  | 230, 280      | 324, 207, 203, 185, 153<br>179, 165, 161, 121, 119,<br>101, 89          | Picrocrocinic acid                        |
| 9   | 19.330               | C <sub>21</sub> H <sub>24</sub> O <sub>11</sub> | 475.1231<br>451.1224  | -4.46<br>4.83  | —             | 427, 367, 343, 271, 253, 235<br>289, 271, 245, 227, 203, 179            | Catechin-O-glucoside                      |
| 10  | 20.964               | C <sub>17</sub> H <sub>24</sub> O <sub>11</sub> | 427.1204<br>463.1436  | 1.69<br>4.56   | 240           | 409, 265, 233, 203<br>403, 241, 223, 193, 179,<br>127, 101              | 6 $\beta$ -Hydroxygeniposide              |
| 11  | 22.231               | C <sub>16</sub> H <sub>26</sub> O <sub>8</sub>  | 369.1533<br>405.1751  | -3.79<br>3.74  | 240           | —<br>345, 327, 183, 165, 161,<br>119, 113, 101                          | <b>Jasminoside B</b>                      |
| 12  | 22.298               | C <sub>15</sub> H <sub>16</sub> O <sub>9</sub>  | 341.0857<br>339.0723  | 2.97<br>-0.42  | —             | 179, 151, 135, 123, 107<br>321, 177                                     | Esculin                                   |
| 13  | 23.315               | C <sub>15</sub> H <sub>14</sub> O <sub>6</sub>  | 291.0860<br>289.0719  | 1.08<br>-0.48  | 280           | 273, 207, 165, 147, 139, 123<br>271, 245, 203, 187, 151, 109            | Catechin                                  |
| 14  | 23.348               | C <sub>16</sub> H <sub>18</sub> O <sub>9</sub>  | 355.1033<br>353.0861  | -2.66<br>4.82  | 234, 280, 330 | 163, 145, 135, 117<br>221, 205, 191, 179, 173,<br>161, 134,             | 3-Caffeoylquinic acid                     |
| 15  | 24.266               | C <sub>10</sub> H <sub>16</sub> O <sub>3</sub>  | —<br>243.1241         | —<br>-1.24     | 245           | —<br>183, 165, 153, 139, 59                                             | Jasminodiol                               |
| 17  | 27.717               | C <sub>21</sub> H <sub>26</sub> O <sub>13</sub> | 487.1456<br>485.1320  | -2.02<br>-3.98 | 228, 255, 290 | 355, 341, 193, 179<br>177                                               | 5,7-Dihydroxychromone-7-rutinoside        |
| 19  | 29.217               | C <sub>16</sub> H <sub>18</sub> O <sub>9</sub>  | —<br>353.0863         | —<br>4.25      | 234, 280, 330 | —<br>191, 179, 173, 135                                                 | 4-Caffeoylquinic acid                     |
| 20  | 29.984               | C <sub>17</sub> H <sub>22</sub> O <sub>10</sub> | 409.1118<br>385.1121  | -3.32<br>4.97  | 240, 285, 330 | 247, 185<br>223, 205, 190, 175                                          | Sinapylglucoside                          |
| 21  | 30.451               | C <sub>21</sub> H <sub>26</sub> O <sub>13</sub> | 487.1437<br>485.1320  | 1.89<br>-3.98  | 228, 255, 290 | 341, 179, 147, 129<br>219, 177                                          | 5,7-Dihydroxychromone -7-neohesperidoside |
| 22  | 30.818               | C <sub>16</sub> H <sub>24</sub> O <sub>10</sub> | 399.1262<br>375.1315  | -0.08<br>-4.85 | 243           | 355, 237, 219<br>357, 315, 227, 213, 195,<br>169, 161, 151              | Dihydrocornic acid                        |
| 23  | 32.185               | C <sub>16</sub> H <sub>26</sub> O <sub>8</sub>  | 369.1533<br>405.1780  | -3.79<br>-3.40 | 241           | —<br>345, 327, 315, 165, 161,<br>113, 101                               | Jasminoside G                             |
| 25  | 33.436               | C <sub>15</sub> H <sub>14</sub> O <sub>6</sub>  | 291.087<br>289.0729   | -2.36<br>-3.92 | 280           | 273, 165, 147, 139, 123<br>271, 245, 227, 203, 179,<br>151, 125, 109    | Epicatechin                               |
| 26  | 36.654               | C <sub>16</sub> H <sub>26</sub> O <sub>8</sub>  | 369.1514<br>345.1538  | 1.70<br>4.89   | 238           | —<br>301, 285, 183, 179, 165,<br>161, 149                               | Jasminoside D                             |
| 27  | 37.271               | C <sub>16</sub> H <sub>26</sub> O <sub>7</sub>  | 331.1762<br>389.1798  | -3.24<br>4.89  | 245           | 169, 151, 139, 123, 109, 85<br>329, 224, 179, 161, 119, 113,<br>101, 89 | Jasminoside A/E                           |
| 28  | 38.504               | C <sub>16</sub> H <sub>26</sub> O <sub>7</sub>  | 331.1758<br>389.1802  | -2.03<br>3.86  | 244           | 169, 151, 139, 123, 109, 85<br>227, 179, 161, 131, 119,<br>113, 101     | Jasminoside A/E                           |

## MS<sup>2</sup> fragmentation ions of 6 $\alpha$ -hydroxygeniposide in reference

| Table 1. Characterization of the Components of the <i>P. scandens</i> decoction by HPLC/DAD/ESI-MS <sup>n</sup> |                      |                            |                                                                                                        |                                |
|-----------------------------------------------------------------------------------------------------------------|----------------------|----------------------------|--------------------------------------------------------------------------------------------------------|--------------------------------|
| Peak                                                                                                            | t <sub>R</sub> (min) | [M – H] <sup>–</sup> (m/z) | HPLC/ESI-MS <sup>n</sup>                                                                               | Identification                 |
| 1                                                                                                               | 15.1                 | 445                        | MS <sup>2</sup> [445]: 283, 191, 147; MS <sup>3</sup> [147]: 119                                       | Paederosid                     |
| 2                                                                                                               | 13.6                 | 463                        | MS <sup>2</sup> [463]: 415, 371, 283; MS <sup>3</sup> [415]: 371, 191; MS <sup>4</sup> [191]: 147, 119 | Paederosidic acid              |
| 3                                                                                                               | 15.7                 | 477                        | MS <sup>2</sup> [477]: 429, 385, 353; MS <sup>3</sup> [385]: 353, 325                                  | Paederosidic acid methyl ester |
| 4                                                                                                               | 10.8                 | 403                        | MS <sup>2</sup> [403]: 241; MS <sup>3</sup> [241]: 223, 193; MS <sup>4</sup> [223]: 205                | 6-Hydroxy geniposide           |
| 5                                                                                                               | 12.8                 | 413                        | MS <sup>2</sup> [413]: 251, 191, 147; MS <sup>3</sup> [147]: 79                                        | Asperuloside                   |
| 6                                                                                                               | 9.0                  | 371                        | MS <sup>2</sup> [371]: 209, 165; MS <sup>3</sup> [165]: 147, 135                                       | Deacetyl asperuloside          |
