# Supplementary material for: A metabolomics approach to study the dual modulation by characterization of chemical alteration during processing of Gardeniae Fructus using UPLC-ESI-QTOF
Source: Royal Society of Chemistry journal article supplement (doi:10.1039/c5ay03265b), 2016-01-01
Supplement: c5ay03265b2.pdf [file c5ay03265b2.pdf]

**Characterization of the compounds in Negative mode**

| No. | Compound Name                                                                                                                                            | Formula                                          | Mass error (ppm) | Mass     |
|-----|----------------------------------------------------------------------------------------------------------------------------------------------------------|--------------------------------------------------|------------------|----------|
| 1   | Geniposide                                                                                                                                               | C <sub>17</sub> H <sub>24</sub> O <sub>10</sub>  | 2.25             | 388.1369 |
| 2   | Genipin                                                                                                                                                  | C <sub>11</sub> H <sub>14</sub> O <sub>5</sub>   | 1.22             | 226.0841 |
| 3   | Nevadensin                                                                                                                                               | C <sub>18</sub> H <sub>16</sub> O <sub>7</sub>   | 1.67             | 344.0896 |
| 4   | Mannitol                                                                                                                                                 | C <sub>6</sub> H <sub>14</sub> O <sub>6</sub>    | -1.12            | 182.079  |
| 5   | Tiglyl tiglate                                                                                                                                           | C <sub>10</sub> H <sub>16</sub> O <sub>2</sub>   | 4.45             | 168.115  |
| 6   | 6alpha-Hydroxygeniposide                                                                                                                                 | C <sub>17</sub> H <sub>24</sub> O <sub>11</sub>  | 0.17             | 404.1319 |
| 7   | Crocin                                                                                                                                                   | C <sub>44</sub> H <sub>64</sub> O <sub>24</sub>  | 2.48             | 976.3788 |
| 8   | 4'-Hydroxywogonin                                                                                                                                        | C <sub>16</sub> H <sub>12</sub> O <sub>6</sub>   | 3.75             | 300.0634 |
| 9   | Onopordin                                                                                                                                                | C <sub>16</sub> H <sub>12</sub> O <sub>7</sub>   | -2.73            | 316.0583 |
| 10  | 5,3'-Dihydroxy-6,7,4',5'-tetramethoxyflavone                                                                                                             | C <sub>19</sub> H <sub>18</sub> O <sub>8</sub>   | -4.97            | 374.1002 |
| 11  | 3',4',5'-Trihydroxywogonin                                                                                                                               | C <sub>16</sub> H <sub>12</sub> O <sub>8</sub>   | 0.9              | 332.0532 |
| 12  | 5,7,3',5'-Tetrahydroxy-8,4'-dimethoxyflavone                                                                                                             | C <sub>17</sub> H <sub>14</sub> O <sub>8</sub>   | 2.86             | 346.0689 |
| 13  | 5,7,3'-Trihydroxy-8,4',5'-trimethoxyflavone                                                                                                              | C <sub>18</sub> H <sub>16</sub> O <sub>8</sub>   | -3.58            | 360.0845 |
| 14  | Gardenin A                                                                                                                                               | C <sub>21</sub> H <sub>22</sub> O <sub>9</sub>   | 0.28             | 418.1264 |
| 15  | Ixoroside                                                                                                                                                | C <sub>16</sub> H <sub>24</sub> O <sub>9</sub>   | 1.64             | 360.142  |
| 16  | Gardoside                                                                                                                                                | C <sub>16</sub> H <sub>22</sub> O <sub>10</sub>  | 0.03             | 374.1213 |
| 17  | [1S-(1alpha,4aalpha,7aalpha)]-7-<br>[(acetyloxy)methyl]-1-(beta-D-<br>glucopyranosyloxy)-1,4a,5,7a-<br>tetrahydrocyclopenta[c]pyran-4-carboxylic<br>acid | C <sub>19</sub> H <sub>26</sub> O <sub>11</sub>  | 2.55             | 430.1475 |
| 18  | Mussaenosidic acid                                                                                                                                       | C <sub>16</sub> H <sub>24</sub> O <sub>10</sub>  | 0.78             | 376.1369 |
| 19  | Shanzhiside                                                                                                                                              | C <sub>16</sub> H <sub>24</sub> O <sub>11</sub>  | 1.75             | 392.1319 |
| 20  | 2-Hydroxyethyl gardenamide A                                                                                                                             | C <sub>13</sub> H <sub>17</sub> N O <sub>5</sub> | 4.73             | 267.1107 |
| 21  | 6'-O-Sinapoyljasminoside C                                                                                                                               | C <sub>27</sub> H <sub>34</sub> O <sub>11</sub>  | 1.33             | 534.2101 |
| 22  | Jasminodiol                                                                                                                                              | C <sub>10</sub> H <sub>16</sub> O <sub>3</sub>   | 1.12             | 184.1099 |
| 23  | Jasminoside A                                                                                                                                            | C <sub>16</sub> H <sub>26</sub> O <sub>7</sub>   | 1.86             | 330.1679 |
| 24  | Jasminoside B                                                                                                                                            | C <sub>16</sub> H <sub>26</sub> O <sub>8</sub>   | 2.98             | 346.1628 |
| 25  | Jasminoside I                                                                                                                                            | C <sub>22</sub> H <sub>36</sub> O <sub>12</sub>  | 2.09             | 492.2207 |
| 26  | Secaubryolide                                                                                                                                            | C <sub>31</sub> H <sub>44</sub> O <sub>5</sub>   | -3.26            | 496.3189 |
| 27  | Gardaloside                                                                                                                                              | C <sub>16</sub> H <sub>22</sub> O <sub>9</sub>   | 1.77             | 358.1264 |
| 28  | Genipin-1-β-gentiobioside                                                                                                                                | C <sub>23</sub> H <sub>34</sub> O <sub>15</sub>  | -0.36            | 550.1898 |
| 29  | Scortechinone H                                                                                                                                          | C <sub>34</sub> H <sub>40</sub> O <sub>8</sub>   | -2.56            | 576.2723 |
| 30  | Scortechinone P                                                                                                                                          | C <sub>34</sub> H <sub>42</sub> O <sub>10</sub>  | 3.2              | 610.2778 |
| 31  | Coronalolide                                                                                                                                             | C <sub>30</sub> H <sub>42</sub> O <sub>5</sub>   | -3.98            | 482.3032 |
| 32  | Sootepin D                                                                                                                                               | C <sub>31</sub> H <sub>48</sub> O <sub>4</sub>   | -0.45            | 484.3553 |
| 33  | Sootepdienone                                                                                                                                            | C <sub>15</sub> H <sub>22</sub> O <sub>2</sub>   | 2.87             | 234.162  |
| 34  | Methyl dihydrojasmonate                                                                                                                                  | C <sub>13</sub> H <sub>22</sub> O <sub>3</sub>   | 3.2              | 226.1569 |
| 35  | Methyl propyl disulfide                                                                                                                                  | C <sub>4</sub> H <sub>10</sub> S <sub>2</sub>    | -1.33            | 122.0224 |

## Characterization of the compounds in Positive mode

| No. | Compound Name                                | Formula                                         | Mass error (ppm) | Mass     |
|-----|----------------------------------------------|-------------------------------------------------|------------------|----------|
| 1   | Geniposide                                   | C <sub>17</sub> H <sub>24</sub> O <sub>10</sub> | 0.35             | 388.1369 |
| 2   | Genipin                                      | C <sub>11</sub> H <sub>14</sub> O <sub>5</sub>  | -1.64            | 226.0841 |
| 3   | Nevadensin                                   | C <sub>18</sub> H <sub>16</sub> O <sub>7</sub>  | 1.26             | 344.0896 |
| 4   | Mannitol                                     | C <sub>6</sub> H <sub>14</sub> O <sub>6</sub>   | -0.53            | 182.079  |
| 5   | Tiglyl tiglate                               | C <sub>10</sub> H <sub>16</sub> O <sub>2</sub>  | -0.12            | 168.115  |
| 6   | 6alpha-Hydroxygeniposide                     | C <sub>17</sub> H <sub>24</sub> O <sub>11</sub> | -0.67            | 404.1319 |
| 7   | Gardenin B                                   | C <sub>19</sub> H <sub>18</sub> O <sub>7</sub>  | -0.11            | 358.1053 |
| 8   | Onopordin                                    | C <sub>16</sub> H <sub>12</sub> O <sub>7</sub>  | 0.06             | 316.0583 |
| 9   | 5,3'-Dihydroxy-6,7,4',5'-tetramethoxyflavone | C <sub>19</sub> H <sub>18</sub> O <sub>8</sub>  | 0.55             | 374.1002 |
| 10  | 5-Hydroxy-7,2',3',4',5'-pentamethoxyflavone  | C <sub>20</sub> H <sub>20</sub> O <sub>8</sub>  | -0.19            | 388.1158 |
| 11  | 5,7,3'-Trihydroxy-8,4',5'-trimethoxyflavone  | C <sub>18</sub> H <sub>16</sub> O <sub>8</sub>  | 1.27             | 360.0845 |
| 12  | Gardenin C                                   | C <sub>20</sub> H <sub>20</sub> O <sub>9</sub>  | -1.87            | 404.1107 |
| 13  | 5,7,4'-Trihydroxy-3,6-dimethoxyflavone       | C <sub>17</sub> H <sub>14</sub> O <sub>7</sub>  | -0.4             | 330.074  |
| 14  | Ixoroside                                    | C <sub>16</sub> H <sub>24</sub> O <sub>9</sub>  | 1.9              | 360.142  |
| 15  | Gardoside                                    | C <sub>16</sub> H <sub>22</sub> O <sub>10</sub> | -1.19            | 374.1213 |
| 16  | Mussaenosidic acid                           | C <sub>16</sub> H <sub>24</sub> O <sub>10</sub> | -2.53            | 376.1369 |
| 17  | 2-Hydroxyethyl gardenamide A                 | C <sub>13</sub> H <sub>17</sub> NO <sub>5</sub> | -0.98            | 267.1107 |
| 18  | 6'-O-Sinapoyljasminoside C                   | C <sub>27</sub> H <sub>34</sub> O <sub>11</sub> | 0.54             | 534.2101 |
| 19  | Jasminoside A                                | C <sub>16</sub> H <sub>26</sub> O <sub>7</sub>  | -0.53            | 330.1679 |
| 20  | Jasminoside B                                | C <sub>16</sub> H <sub>26</sub> O <sub>8</sub>  | 1.39             | 346.1628 |
| 21  | Jasminoside I                                | C <sub>22</sub> H <sub>36</sub> O <sub>12</sub> | 1.66             | 492.2207 |
| 22  | Secaubrytriol                                | C <sub>30</sub> H <sub>50</sub> O <sub>5</sub>  | 1.58             | 490.3658 |
| 23  | Genipin gentiobioside                        | C <sub>23</sub> H <sub>34</sub> O <sub>15</sub> | 0.68             | 550.1898 |
